# Supplementary material
Source: PubMed Central journal article supplement (PMC4972292)
Supplement: supp_pp.16.00705_PP2016-00705DR1_Supplemental_Material.pdf [file supp_pp.16.00705_PP2016-00705DR1_Supplemental_Material.pdf]

**Supplemental materials**

**Rice root architectural plasticity traits and genetic regions for adaptation to variable cultivation and stress conditions**

Nitika Sandhu, K. Anitha Raman, Rolando O. Torres, Alain Audebert, Audrey Dardou, Arvind Kumar, Amelia Heñry

**Supp Table 1.** Mean values of all genotypes and significance level of genotypes for each treatment for root, shoot, and water uptake traits in the greenhouse lysimeter study. Mean values for all genotypes for each trait in respective treatments are shown. Significant differences among genotypes are indicated by \*: p<0.05, \*\*: p<0.01, \*\*\*p<0.001, and significant differences among treatments are indicated by letter groups.

10

| Aus 276/3*MTU1010                          | LDS       |           | LRW        |           | UDS      |           | URW        |          |
|--------------------------------------------|-----------|-----------|------------|-----------|----------|-----------|------------|----------|
|                                            | stress    | control   | stress     | control   | stress   | control   | stress     | control  |
| TWU (kg)                                   | 7.21**e   | 11.4a*    | 6.52*f     | 10.7**b   | 5.48*g   | 10.1**c   | 4.56h      | 9.32d    |
| RGR (g g <sup>-1</sup> day <sup>-1</sup> ) | 0.187***c | 0.222ab   | 0.205bc    | 0.204*bc  | 0.216*ab | 0.216ab   | 0.200***bc | 0.237**a |
| RDW 0-20 cm (g)                            | 1.3f      | 2.45a     | 1.32f      | 1.71b     | 1.63*d   | 1.48e     | 1.33f      | 1.66c    |
| RDW 20-40 cm (g)                           | 0.887*a   | 0.783b    | 0.547d     | 0.809b    | 0.698c   | 0.495e    | 0.372f     | 0.519de  |
| RDW 40-60 cm (g)                           | 0.57a     | 0.283f    | 0.41c      | 0.53b     | 0.421*c  | 0.332e    | 0.369d     | 0.383d   |
| RDW > 60 cm (g)                            | 0.054cd   | 0.143e    | 0.033*cde  | 0.149e    | 0.133a   | 0.104b    | 0.060*c    | 0.031de  |
| TRDW (g)                                   | 2.81d     | 3.51a     | 2.28g      | 3.05b     | 2.88c    | 2.4f      | 2.13*h     | 2.59e    |
| SDW (g)                                    | 28.72***g | 38.15***c | 37.10***d  | 47.88***a | 23.65*h  | 36.57***e | 32.58f     | 39.38*b  |
| WUE (g L <sup>-1</sup> )                   | 27.32d    | 24.45f    | 39.63**b   | 21.81*g   | 30.25*c  | 26.32**e  | 51.18a     | 21.49*h  |
| R/S                                        | 0.096a    | 0.096a    | 0.066b     | 0.065b    | 0.068a   | 0.065b    | 0.066***b  | 0.064b   |
| TRL >60 cm (cm)                            | 1325.69f  | 477.2h    | 1376.92**e | 768.74g   | 2971.29b | 2858.72a  | 2504.66c   | 1811.94d |
| Ave root diam > 60 cm (mm)                 | 2.034b    | 1.025a    | 0.152c     | 0.139c    | 0.13d    | 0.142*d   | 0.132*d    | 0.134d   |
| % LR >60 cm                                | 76.86b    | 78.17a    | 63.78g     | 54.92h    | 82.0c    | 75.32e    | 83.87d     | 72.44f   |
| # Forks > 60 cm                            | 10750f    | 3910h     | 11988*e    | 5606g     | 25300b   | 22694a    | 23980c     | 15218d   |

  

| Kali Aus/2*MTU1010                         | LDS       |          | LRW       |           | UDS      |           | URW       |          |
|--------------------------------------------|-----------|----------|-----------|-----------|----------|-----------|-----------|----------|
|                                            | stress    | control  | stress    | control   | stress   | control   | stress    | control  |
| TWU (kg)                                   | 7.28c     | 11.8a    | 6.23***d  | 11.6a     | 5.23e    | 9.23*b    | 4.58f     | 9.36b    |
| RGR (g g <sup>-1</sup> day <sup>-1</sup> ) | 0.216**a  | 0.213a   | 0.181*b   | 0.216***a | 0.213*a  | 0.21a     | 0.216*a   | 0.220**a |
| RDW 0-20 cm (g)                            | 1.41c     | 2.08*a   | 1.42*c    | 2.07*a    | 1.37d    | 1.43c     | 1.43*c    | 1.82b    |
| RDW 20-40 cm (g)                           | 0.852c    | 1.001b   | 0.47g     | 0.709d    | 0.567*e  | 0.5f      | 0.401h    | 0.339a   |
| RDW 40-60 cm (g)                           | 0.518b    | 0.35e    | 0.474c    | 0.601a    | 0.411d   | 0.324e    | 0.323e    | 0.462c   |
| RDW > 60 cm (g)                            | 0.048bc   | 0.031bc  | 0.034*bc  | 0.023c    | 0.112a   | 0.098a    | 0.058b    | 0.033bc  |
| TRDW (g)                                   | 2.82d     | 3.45b    | 2.39**f   | 3.39*c    | 2.46e    | 2.34g     | 2.22*h    | 2.14a    |
| SDW (g)                                    | 28.70*g   | 39.76b   | 38.99***d | 51.81a    | 21.68*h  | 30.89*f   | 32.89***e | 39.12c   |
| WUE (g L <sup>-1</sup> )                   | 27.16**d  | 24.59e   | 40.48**b  | 22.37g    | 28.91c   | 23.98f    | 50.95a    | 20.74h   |
| R/S                                        | 0.096bc   | 0.087bcd | 0.064d    | 0.066*d   | 0.113b   | 0.082cd   | 0.068d    | 0.049a   |
| TRL >60 cm (cm)                            | 1385.59*f | 589.57h  | 1957.42e  | 1016.23g  | 2810.28b | 2530.23*a | 2749.82c  | 2262.56d |
| Ave root diam > 60 cm (mm)                 | 0.961b    | 0.482a   | 0.155e    | 0.175d    | 0.135f   | 0.142ef   | 0.435c    | 0.14f    |
| % LR >60 cm                                | 75.79c    | 71.35a   | 68.35f    | 60.37h    | 82.1d    | 66.06g    | 86.64b    | 77.76e   |

|                 |        |       |        |       |        |          |        |        |
|-----------------|--------|-------|--------|-------|--------|----------|--------|--------|
| # Forks > 60 cm | 11785f | 4585h | 17539e | 7556g | 23347c | 22106**b | 26307a | 20249d |
|-----------------|--------|-------|--------|-------|--------|----------|--------|--------|

11

TWU<sup>2</sup>: Total water uptake (kg), RGR: relative growth rate from 24 to 31 days after sowing, RDW: root dry weight, TRDW: total root dry weight (all depths) (g), SDW: shoot dry weight (g), WUE: water use efficiency (g shoot mass L<sup>-1</sup> water uptake), R/S: root:shoot ratio, TRL: total root length (cm), Ave root diam: average root diameter (mm), % LR: % lateral roots, LDS: lowland drought stress, LRW: lowland re-watered, UDS: upland drought stress, URW: upland re-watered.

17 **Supp. Table 2.** Field trial means for grain yield (GY), days to flowering (DTF), and plant height (PHT), as well as the stress classification based  
 18 on trial GY means.  
 19

| Env. code          | Study      | Expt         | GY<br>(kg ha <sup>-1</sup> ) | DTF | PHT<br>(cm) | Stress classification              |
|--------------------|------------|--------------|------------------------------|-----|-------------|------------------------------------|
| Aus 276/3*MTU1010  |            |              |                              |     |             |                                    |
| 1                  | Agronomic  | 2012LNS      | 4432                         | 77  | 126         | control                            |
| 2                  | Agronomic  | 2012LS       | 1578                         | 77  | 104         | moderate stress                    |
| 3                  | Agronomic  | 2012UNS      | 1766                         | 81  | 103         | moderate stress                    |
| 4                  | Agronomic  | 2012US       | 528                          | 99  | 81          | severe stress                      |
| 5                  | Agronomic  | 2013UNS      | 3923                         | 76  | 115         | control                            |
| 6                  | Agronomic  | 2013US       | 37                           | 101 | 66          | over-stressed (excluded from AMMI) |
| 7                  | Physiology | 2013UNS phys | 3032                         | 80  | 101         | control                            |
| 8                  | Physiology | 2013US phys  | 1223                         | 88  | 95          | moderate stress                    |
| Kali Aus/2*MTU1010 |            |              |                              |     |             |                                    |
| 1                  | Agronomic  | 2012LNS      | 4582                         | 78  | 129         | control                            |
| 2                  | Agronomic  | 2012LS       | 3224                         | 77  | 106         | control                            |
| 3                  | Agronomic  | 2012UNS      | 1701                         | 77  | 95          | moderate stress                    |
| 4                  | Agronomic  | 2012US       | 440                          | 86  | 89          | over-stressed (excluded from AMMI) |
| 5                  | Agronomic  | 2013LS       | 899                          | 79  | 103         | severe stress                      |
| 6                  | Agronomic  | 2013UNS      | 1946                         | 82  | 91          | moderate stress                    |
| 7                  | Agronomic  | 2013US       | 23                           | 103 | 61          | over-stressed (excluded from AMMI) |
| 8                  | Physiology | 2013UNS phys | 2541                         | 84  | 94          | moderate stress                    |
| 9                  | Physiology | 2013US phys  | 967                          | 101 | 65          | severe stress                      |

20  
 21  
 22  
 23  
 24  
 25  
 26

27 **Supp. Table 3.** Root, shoot, and water uptake traits measured in the field physiology experiment. Mean values  
 28 for all genotypes for each trait are shown. \*: p<0.05, \*\*: p<0.01, \*\*\*: p<0.001.

29

| Depth    | Trait                      | Aus 276/3*MTU1010 |         | Kali Aus/2*MTU1010 |         | Treatment effect |
|----------|----------------------------|-------------------|---------|--------------------|---------|------------------|
|          |                            | Control           | Stress  | Control            | Stress  |                  |
| 0-15 cm  | RLD (cm cm <sup>-3</sup> ) | 5.919*            | 3.022   | 6.453*             | 3.146   | ***              |
|          | % LR                       | 79.92             | 78.65*  | 79.8               | 80.01   | ns               |
|          | # Forks                    | 8691.02*          | 4002.14 | 9594.65*           | 4033.78 | ***              |
|          | Ave root diam (mm)         | 0.1655*           | 0.1669  | 0.1658*            | 0.162   | ns               |
|          | RDW (g)                    | 0.0193*           | 0.00737 | 0.0234             | 0.0076  | ***              |
| 15-30 cm | RLD (cm cm <sup>-3</sup> ) | 0.9439            | 0.8875  | 1.0187             | 0.7535  | **               |
|          | % LR                       | 63.14             | 66.04*  | 62.91              | 64.82*  | ***              |
|          | # Forks                    | 2238.21           | 1346.74 | 2481.37            | 1100.25 | ***              |
|          | Ave root diam (mm)         | 0.2723            | 0.2311* | 0.2537             | 0.2438  | ***              |
|          | RDW (g)                    | 0.00326*          | 0.0066  | 0.0034             | 0.0065  | ***              |
| 30-45 cm | RLD (cm cm <sup>-3</sup> ) | 0.8607            | 1.224   | 0.8526             | 1.0507* | **               |
|          | % LR                       | 65.76*            | 75.05   | 65.417             | 76.338* | ***              |
|          | # Forks                    | 2193.9            | 3784.5  | 2452.96            | 3258.11 | ***              |
|          | Ave root diam (mm)         | 0.2698            | 0.1922  | 0.2717             | 0.1863  | ***              |
|          | RDW (g)                    | 0.00156           | 0.0048  | 0.00146            | 0.00507 | ***              |
| 45-60 cm | RLD (cm cm <sup>-3</sup> ) | 0.4966*           | 0.3845  | 0.5435             | 0.3388  | ***              |
|          | % LR                       | 59.263*           | 65.58*  | 59.52              | 63.09   | *                |
|          | # Forks                    | 1885.66           | 453.04  | 2113.08            | 452.55  | ***              |
|          | Ave root diam (mm)         | 0.301             | 0.235   | 0.3594             | 0.2607  | ***              |
|          | RDW (g)                    | 0.00069           | 0.00329 | 0.00055            | 0.00263 | ***              |
| 0-60 cm  | TRDW (g)                   | 0.0244*           | 0.0195  | 0.0285*            | 0.0194  | ***              |

30

31 RLD: root length density (cm cm<sup>-3</sup>), % LR: % lateral roots, Ave root diam: average root diameter (mm),  
 32 RDW: root dry weight (g), TDRW: Total root dry weight (g)

33

34

35

36 **Supp. Table 4.** Mean values of all genotypes and significance level of the treatment effect on different root and  
 37 shoot traits in the Rhizoscope experiment. \*: p<0.05, \*\*: p<0.01, \*\*\*: p<0.001.

|    | <b>Trait</b>                 | <b>Control (P)</b> | <b>Low P (P/8)</b> | <b>Treatment effect</b> |
|----|------------------------------|--------------------|--------------------|-------------------------|
| 39 | Tiller number                | 4.5                | 5.3                | ***                     |
| 40 | Shoot length                 | 64                 | 63                 | ns                      |
| 41 | SDW (g)                      | 0.710              | 0.775              | ns                      |
| 42 | RDW 0-15 cm (g)              | 0.127              | 0.150              | ***                     |
| 43 | RDW 15-30 cm (g)             | 0.019              | 0.024              | *                       |
| 44 | RDW > 30 cm (g)              | 0.001              | 0.001              | ns                      |
| 45 | TRDW (g)                     | 0.146              | 0.175              | ***                     |
| 46 | R/S                          | 0.211              | 0.232              | **                      |
| 47 | Root number >20 cm           | 10                 | 11                 | ns                      |
| 48 | Root number >30 cm           | 1.5                | 2.2                | *                       |
| 49 | Root diameter (cm)           | 0.0572             | 0.0641             | ***                     |
| 50 | Root length in rhizobox (cm) | 29.57              | 31.19              | **                      |
| 51 | Root length (cm)             | 30.98              | 32.15              | *                       |
| 52 | Root cone angle (°)          | 77.30              | 77.52              | ns                      |

52 RDW: Root dry weight (g), SDW: shoot dry weight (g), R/S: root:shoot ratio, TDRW: Total root dry weight (g), P:  
 53 Phosphorus

54

55 **Supp. Table 5.** Correlation matrix of root architectural plasticity traits measured in the Aus 276 population in the field physiology study. Values shown are the  
 56 Pearson two-sided correlation coefficient and significance levels are indicated by \*: p<0.05, \*\*: p<0.01, \*\*\*: p<0.001. Correlations with the yield stability  
 57 coefficient are also shown.  
 58

|                   | Yield<br>stability<br>coeff. | plas<br>RLD 0-<br>15 cm | plas<br>RLD 15-<br>30 cm | plas<br>RLD 30-<br>45 cm | plas<br>RLD 45-<br>60 cm | plas<br>%LR 0-<br>15 cm | plas<br>%LR 15-<br>30 cm | plas<br>%LR 30-<br>45 cm | plas<br>%LR 45-<br>60 cm | plas<br>RDW 0-<br>15 cm | plas<br>RDW<br>15-30<br>cm | plas<br>RDW<br>30-45<br>cm |
|-------------------|------------------------------|-------------------------|--------------------------|--------------------------|--------------------------|-------------------------|--------------------------|--------------------------|--------------------------|-------------------------|----------------------------|----------------------------|
| plas RLD 0-15 cm  | -0.23                        |                         |                          |                          |                          |                         |                          |                          |                          |                         |                            |                            |
| plas RLD 15-30 cm | 0.53                         | -0.32                   |                          |                          |                          |                         |                          |                          |                          |                         |                            |                            |
| plas RLD 30-45 cm | 0.72*                        | -0.22                   | 0.44                     |                          |                          |                         |                          |                          |                          |                         |                            |                            |
| plas RLD 45-60 cm | 0.67*                        | 0.3                     | 0.23                     | 0.45                     |                          |                         |                          |                          |                          |                         |                            |                            |
| plas %LR 0-15 cm  | -0.17                        | 0.82**                  | -0.31                    | -0.41                    | 0.29                     |                         |                          |                          |                          |                         |                            |                            |
| plas %LR 15-30 cm | 0.09                         | -0.66*                  | 0.1                      | 0.12                     | 0.05                     | -0.71*                  |                          |                          |                          |                         |                            |                            |
| plas %LR 30-45 cm | 0.43                         | -0.05                   | 0.15                     | 0.78**                   | 0.13                     | -0.32                   | -0.01                    |                          |                          |                         |                            |                            |
| plas %LR 45-60 cm | 0.18                         | -0.42                   | 0.7*                     | 0.18                     | 0.12                     | -0.2                    | 0.18                     | -0.17                    |                          |                         |                            |                            |
| plas RDW 0-15 cm  | 0.21                         | -0.58                   | -0.09                    | 0.06                     | -0.35                    | -0.42                   | 0.13                     | 0.08                     | 0.07                     |                         |                            |                            |
| plas RDW 15-30 cm | -0.59                        | -0.39                   | -0.06                    | -0.62                    | -0.74**                  | -0.28                   | 0.17                     | -0.46                    | 0.05                     | 0.05                    |                            |                            |
| plas RDW 30-45 cm | -0.62                        | 0.03                    | -0.05                    | -0.54                    | -0.63                    | 0.15                    | -0.13                    | -0.09                    | 0.09                     | -0.1                    | 0.55                       |                            |
| plas RDW 45-60 cm | -0.2                         | -0.51                   | -0.01                    | -0.2                     | -0.55                    | -0.22                   | -0.06                    | -0.01                    | 0.25                     | 0.4                     | 0.64*                      | 0.49                       |

59 RDW: root dry weight (g), RLD: root length density (cm cm<sup>-3</sup>), % LR: % lateral roots, plas: plasticity

60 **Supp. Table 6.** Correlation matrix of root architectural plasticity traits measured in the Aus 276 population in the lysimeter study. Values shown are the  
 61 Pearson two-sided correlation coefficient and significance levels are indicated by \*: p<0.05, \*\*: p<0.01, \*\*\*: p<0.001. Correlations with the yield stability  
 62 coefficient are also shown.  
 63  
 64

65 **Lowland lysimeter**

|                       | Yield<br>stability<br>coeff. | Plas<br>TRL ><br>60 cm<br>LDS | Plas TRL<br>> 60 cm<br>LRW | Plas %<br>LR > 60<br>cm LDS | Plas %<br>LR > 60<br>cm LRW | Plas<br>RDW 0-<br>20 cm<br>LDS | Plas<br>RDW 0-<br>20 cm<br>LRW | Plas<br>RDW<br>20-40<br>cm LDS | Plas<br>RDW<br>20-40<br>cm LRW | Plas<br>RDW<br>40-60<br>cm LDS | Plas<br>RDW<br>40-60<br>cm LRW | Plas<br>RDW ><br>60 cm<br>LDS |
|-----------------------|------------------------------|-------------------------------|----------------------------|-----------------------------|-----------------------------|--------------------------------|--------------------------------|--------------------------------|--------------------------------|--------------------------------|--------------------------------|-------------------------------|
| Plas TRL > 60 cm LDS  | -0.23                        |                               |                            |                             |                             |                                |                                |                                |                                |                                |                                |                               |
| Plas TRL > 60 cm LRW  | -0.29                        | -0.27                         |                            |                             |                             |                                |                                |                                |                                |                                |                                |                               |
| Plas % LR > 60 cm LDS | -0.39                        | 0.57**                        | -0.29                      |                             |                             |                                |                                |                                |                                |                                |                                |                               |
| Plas % LR > 60 cm LRW | -0.02                        | -0.18                         | 0.47*                      | -0.01                       |                             |                                |                                |                                |                                |                                |                                |                               |
| Plas RDW 0-20 cm LDS  | -0.26                        | 0.06                          | 0.37                       | 0.06                        | -0.07                       |                                |                                |                                |                                |                                |                                |                               |
| Plas RDW 0-20 cm LRW  | -0.01                        | 0.38                          | 0.15                       | -0.03                       | -0.2                        | 0.41                           |                                |                                |                                |                                |                                |                               |
| Plas RDW 20-40 cm LDS | -0.33                        | 0.08                          | 0.11                       | 0.34                        | 0.09                        | 0.49*                          | 0.16                           |                                |                                |                                |                                |                               |
| Plas RDW 20-40 cm LRW | -0.26                        | 0.79***                       | -0.26                      | 0.53*                       | -0.01                       | 0.14                           | 0.23                           | 0.34                           |                                |                                |                                |                               |
| Plas RDW 40-60 cm LDS | 0.15                         | 0.32                          | -0.22                      | 0.06                        | -0.07                       | 0.01                           | 0.24                           | 0.28                           | 0.54**                         |                                |                                |                               |
| Plas RDW 40-60 cm LRW | -0.29                        | -0.08                         | 0.2                        | 0.02                        | 0.08                        | 0.46*                          | 0.09                           | 0.43*                          | 0.31                           | 0.49                           |                                |                               |
| Plas RDW > 60 cm LDS  | -0.35                        | 0.04                          | 0.17                       | 0.36                        | 0.29                        | 0.4                            | 0.01                           | 0.75***                        | 0.3                            | 0.15                           | 0.33                           |                               |
| Plas RDW > 60 cm LRW  | -0.04                        | 0.07                          | -0.17                      | 0.25                        | -0.02                       | 0.13                           | -0.1                           | 0.59**                         | 0.27                           | 0.48*                          | 0.4                            | 0.36                          |

66  
 67 **Upland lysimeter**

|                       | Yield<br>stability<br>coeff. | Plas TRL<br>> 60 cm<br>UDS | Plas TRL<br>> 60 cm<br>URW | Plas %<br>LR > 60<br>cm UDS | Plas %<br>LR > 60<br>cm<br>URW | Plas<br>RDW 0-<br>20 cm<br>UDS | Plas<br>RDW 0-<br>20 cm<br>URW | Plas<br>RDW<br>20-40<br>cm UDS | Plas<br>RDW<br>20-40<br>cm<br>URW | Plas<br>RDW<br>40-60<br>cm UDS | Plas<br>RDW<br>40-60<br>cm<br>URW | Plas<br>RDW ><br>60 cm<br>UDS |
|-----------------------|------------------------------|----------------------------|----------------------------|-----------------------------|--------------------------------|--------------------------------|--------------------------------|--------------------------------|-----------------------------------|--------------------------------|-----------------------------------|-------------------------------|
| Plas TRL > 60 cm UDS  | 0.19                         |                            |                            |                             |                                |                                |                                |                                |                                   |                                |                                   |                               |
| Plas TRL > 60 cm URW  | -0.04                        | 0.06                       |                            |                             |                                |                                |                                |                                |                                   |                                |                                   |                               |
| Plas % LR > 60 cm UDS | 0.22                         | 0.27                       | -0.07                      |                             |                                |                                |                                |                                |                                   |                                |                                   |                               |
| Plas % LR > 60 cm URW | -0.14                        | -0.01                      | 0.27                       | -0.1                        |                                |                                |                                |                                |                                   |                                |                                   |                               |
| Plas RDW 0-20 cm UDS  | -0.57**                      | -0.11                      | -0.01                      | -0.37                       | 0.16                           |                                |                                |                                |                                   |                                |                                   |                               |
| Plas RDW 0-20 cm URW  | -0.13                        | -0.16                      | -0.03                      | 0.09                        | -0.36                          | 0.53                           |                                |                                |                                   |                                |                                   |                               |

|                       |        |       |       |       |       |      |      |       |        |       |       |     |  |
|-----------------------|--------|-------|-------|-------|-------|------|------|-------|--------|-------|-------|-----|--|
| Plas RDW 20-40 cm UDS | -0.46* | 0.19  | 0.13  | 0.08  | 0.39  | 0.3  | 0.18 |       |        |       |       |     |  |
| Plas RDW 20-40 cm URW | -0.05  | 0.04  | 0.14  | -0.23 | 0.18  | 0.29 | 0.28 | 0.25  |        |       |       |     |  |
| Plas RDW 40-60 cm UDS | 0.01   | -0.15 | 0.04  | -0.2  | -0.02 | 0.19 | 0.09 | 0.07  | 0.26   |       |       |     |  |
| Plas RDW 40-60 cm URW | 0.14   | -0.05 | 0.23  | -0.18 | -0.1  | 0.09 | 0.43 | 0.2   | 0.57** | 0.44* |       |     |  |
| Plas RDW > 60 cm UDS  | 0.04   | 0.18  | -0.01 | 0.11  | 0.13  | 0.36 | 0.23 | -0.02 | 0.13   | 0.25  | 0.13  |     |  |
| Plas RDW > 60 cm URW  | 0.09   | 0.5   | -0.2  | 0.14  | -0.08 | 0.12 | 0.28 | 0.43  | 0.26   | 0.19  | 0.49* | 0.2 |  |

68 TRL: total root length (cm), RDW: root dry weight (g), % LR: % lateral roots, LDS: lowland drought stress, LRW: lowland re-watered, UDS: upland drought  
69 stress, URW: upland re-watered.

70



71 **Supp. Table 7.** Correlation matrix of root architectural plasticity traits measured in the Aus 276 population in the Rhizoscope study. Values shown are the  
 72 Pearson two-sided correlation coefficient and significance levels are indicated by \*: p<0.05, \*\*: p<0.01, \*\*\*: p<0.001. Correlations with the yield stability  
 73 coefficient are also shown.  
 74

|                          | Yield stability coeff. | Plas root length in box | Plas root length | Plas RDW 0-15 cm | Plas RDW 15-30 cm | Plas RDW > 30 cm | Plas TRDW | Plas R/S | Plas Root number > 20 cm | Plas Root number > 30 cm | Root diameter |
|--------------------------|------------------------|-------------------------|------------------|------------------|-------------------|------------------|-----------|----------|--------------------------|--------------------------|---------------|
| Plas root length in box  | -0.11                  |                         |                  |                  |                   |                  |           |          |                          |                          |               |
| Plas root length         | 0.11                   | 0.87***                 |                  |                  |                   |                  |           |          |                          |                          |               |
| Plas RDW 0-15 cm         | 0.09                   | 0.64**                  | 0.59**           |                  |                   |                  |           |          |                          |                          |               |
| Plas RDW 15-30 cm        | -0.1                   | 0.83***                 | 0.82***          | 0.82***          |                   |                  |           |          |                          |                          |               |
| Plas RDW > 30 cm         | 0.25                   | 0.45                    | 0.63**           | 0.42             | 0.48*             |                  |           |          |                          |                          |               |
| Plas TRDW                | 0.08                   | 0.66***                 | 0.63**           | 1                | 0.85***           | 0.45             |           |          |                          |                          |               |
| Plas R/S                 | 0.18                   | 0.05                    | 0.1              | 0.41             | 0.05***           | 0.19             | 0.41      |          |                          |                          |               |
| Plas Root number > 20 cm | 0.06                   | 0.62**                  | 0.61**           | 0.78***          | 0.69**            | 0.3              | 0.8***    | 0.38     |                          |                          |               |
| Plas Root number > 30 cm | 0.46                   | 0.69**                  | 0.65**           | 0.57*            | 0.62              | 0.68**           | 0.57*     | 0.09     | 0.34                     |                          |               |
| Root diameter            | 0.32                   | 0.22                    | 0.15             | 0.29             | 0.27              | 0.25             | 0.3       | 0.17     | 0.24                     | 0.47                     |               |
| Root cone angle          | 0                      | 0.06                    | 0.18             | -0.09            | -0.04             | 0.36             | -0.08     | 0.01     | 0.03                     | 0.09                     | 0.03          |

75 RDW: root dry weight (g), TRDW: total root dry weight (g), R/S: root shoot ratio, plas: plasticity

76 **Supp. Table 8.** Correlation matrix of root architectural plasticity traits measured in the Kali Aus population in the field physiology study. Values shown are the  
 77 Pearson two-sided correlation coefficient and significance levels are indicated by \*: p<0.05, \*\*: p<0.01, \*\*\*: p<0.001. Correlations with the yield stability  
 78 coefficient are also shown.  
 79

|                   | Yield<br>stability<br>coeff. | plas<br>RLD 0-<br>15 cm | plas<br>RLD 15-<br>30 cm | plas<br>RLD 30-<br>45 cm | plas<br>RLD 45-<br>60 cm | plas<br>%LR 0-<br>15 cm | plas<br>%LR 15-<br>30 cm | plas<br>%LR 30-<br>45 cm | plas<br>%LR 45-<br>60 cm | plas<br>RDW 0-<br>15 cm | plas<br>RDW<br>15-30<br>cm | plas<br>RDW<br>30-45<br>cm |
|-------------------|------------------------------|-------------------------|--------------------------|--------------------------|--------------------------|-------------------------|--------------------------|--------------------------|--------------------------|-------------------------|----------------------------|----------------------------|
| plas RLD 0-15 cm  | 0.14                         |                         |                          |                          |                          |                         |                          |                          |                          |                         |                            |                            |
| plas RLD 15-30 cm | -0.14                        | 0.61                    |                          |                          |                          |                         |                          |                          |                          |                         |                            |                            |
| plas RLD 30-45 cm | 0.13                         | 0.44                    | 0.23                     |                          |                          |                         |                          |                          |                          |                         |                            |                            |
| plas RLD 45-60 cm | -0.04                        | -0.11                   | -0.08                    | 0.76**                   |                          |                         |                          |                          |                          |                         |                            |                            |
| plas %LR 0-15 cm  | -0.18                        | 0.62                    | 0.37                     | 0.41                     | 0.17                     |                         |                          |                          |                          |                         |                            |                            |
| plas %LR 15-30 cm | 0.09                         | 0.09                    | 0.15                     | -0.14                    | -0.18                    | -0.04                   |                          |                          |                          |                         |                            |                            |
| plas %LR 30-45 cm | -0.18                        | 0.31                    | 0.37                     | 0.83**                   | 0.57                     | 0.26                    | 0.04                     |                          |                          |                         |                            |                            |
| plas %LR 45-60 cm | 0.03                         | -0.22                   | 0.13                     | 0.16                     | 0.43                     | 0.31                    | -0.3                     | 0                        |                          |                         |                            |                            |
| plas RDW 0-15 cm  | -0.07                        | -0.78**                 | -0.51                    | -0.41                    | -0.13                    | -0.71*                  | 0.35                     | -0.09                    | -0.17                    |                         |                            |                            |
| plas RDW 15-30 cm | 0.41                         | -0.52                   | -0.34                    | -0.24                    | 0.09                     | -0.38                   | -0.03                    | -0.47                    | 0.31                     | 0.23                    |                            |                            |
| plas RDW 30-45 cm | -0.35                        | 0.1                     | 0.09                     | -0.44                    | -0.34                    | 0.42                    | 0.47                     | -0.4                     | -0.14                    | -0.13                   | 0.02                       |                            |
| plas RDW 45-60 cm | 0.37                         | -0.35                   | -0.44                    | -0.47                    | -0.35                    | -0.03                   | -0.25                    | -0.66*                   | 0.37                     | 0.11                    | 0.62                       | 0.11                       |

80 RDW: root dry weight (g), RLD: root length density (cm cm<sup>-3</sup>), % LR: % lateral roots, plas: plasticity

81 **Supp. Table 9.** Correlation matrix of root architectural plasticity traits measured in the Kali Aus population in the lysimeter study. Values shown are the  
 82 Pearson two-sided correlation coefficient and significance levels are indicated by \*: p<0.05, \*\*: p<0.01, \*\*\*: p<0.001. Correlations with the yield stability  
 83 coefficient are also shown.  
 84  
 85

86 **Lowland lysimeter**

|                       | Yield stability coeff. | Plas TRL > 60 cm LDS | Plas TRL > 60 cm LRW | Plas % LR > 60 cm LDS | Plas % LR > 60 cm LRW | Plas RDW 0-20 cm LDS | Plas RDW 0-20 cm LRW | Plas RDW 20-40 cm LDS | Plas RDW 20-40 cm LRW | Plas RDW 40-60 cm LDS | Plas RDW 40-60 cm LRW | Plas RDW > 60 cm LDS | Plas RDW > 60 cm LRW |
|-----------------------|------------------------|----------------------|----------------------|-----------------------|-----------------------|----------------------|----------------------|-----------------------|-----------------------|-----------------------|-----------------------|----------------------|----------------------|
| Plas TRL > 60 cm LDS  | 0.17                   |                      |                      |                       |                       |                      |                      |                       |                       |                       |                       |                      |                      |
| Plas TRL > 60 cm LRW  | -0.21                  | 0.12                 |                      |                       |                       |                      |                      |                       |                       |                       |                       |                      |                      |
| Plas % LR > 60 cm LDS | 0.34                   | 0.46*                | -0.05                |                       |                       |                      |                      |                       |                       |                       |                       |                      |                      |
| Plas % LR > 60 cm LRW | -0.19                  | -0.02                | 0.66***              | -0.09                 |                       |                      |                      |                       |                       |                       |                       |                      |                      |
| Plas RDW 0-20 cm LDS  | 0.17                   | -0.22                | -0.46*               | -0.11                 | -0.26                 |                      |                      |                       |                       |                       |                       |                      |                      |
| Plas RDW 0-20 cm LRW  | 0.03                   | -0.57*               | -0.31                | 0                     | -0.41                 | 0.39                 |                      |                       |                       |                       |                       |                      |                      |
| Plas RDW 20-40 cm LDS | 0.09                   | -0.06                | -0.18                | -0.23                 | -0.43*                | 0.01                 | -0.03                |                       |                       |                       |                       |                      |                      |
| Plas RDW 20-40 cm LRW | -0.29                  | 0                    | 0.03                 | -0.3                  | 0.04                  | -0.27                | -0.37                | 0.23                  |                       |                       |                       |                      |                      |
| Plas RDW 40-60 cm LDS | 0.24                   | -0.18                | -0.01                | -0.21                 | -0.13                 | 0.12                 | 0.03                 | 0.64**                | -0.14                 |                       |                       |                      |                      |
| Plas RDW 40-60 cm LRW | -0.07                  | 0.2                  | 0.26                 | -0.05                 | 0.17                  | -0.39                | -0.1                 | 0.06                  | 0.06                  | -0.02                 |                       |                      |                      |
| Plas RDW > 60 cm LDS  | 0.03                   | 0.64**               | 0.21                 | 0.55*                 | 0                     | -0.3                 | -0.22                | -0.27                 | -0.19                 | -0.16                 | 0.06                  |                      |                      |
| Plas RDW > 60 cm LRW  | -0.08                  | 0.4                  | 0.02                 | 0.42                  | -0.11                 | -0.38                | -0.2                 | -0.04                 | 0.31                  | -0.12                 | 0.03                  | 0.19                 |                      |

87  
 88 **Upland Lysimeter**  
 89

|                       | Yield stability coeff. | Plas TRL > 60 cm UDS | Plas TRL > 60 cm URW | Plas % LR > 60 cm UDS | Plas % LR > 60 cm URW | Plas RDW 0-20 cm UDS | Plas RDW 0-20 cm URW | Plas RDW 20-40 cm UDS | Plas RDW 20-40 cm URW | Plas RDW 40-60 cm UDS | Plas RDW 40-60 cm URW | Plas RDW > 60 cm UDS | Plas RDW > 60 cm URW |
|-----------------------|------------------------|----------------------|----------------------|-----------------------|-----------------------|----------------------|----------------------|-----------------------|-----------------------|-----------------------|-----------------------|----------------------|----------------------|
| Plas TRL > 60 cm UDS  | -0.3                   |                      |                      |                       |                       |                      |                      |                       |                       |                       |                       |                      |                      |
| Plas TRL > 60 cm URW  | -0.12                  | 0.16                 |                      |                       |                       |                      |                      |                       |                       |                       |                       |                      |                      |
| Plas % LR > 60 cm UDS | -0.07                  | 0.47*                | 0.22                 |                       |                       |                      |                      |                       |                       |                       |                       |                      |                      |
| Plas % LR > 60 cm URW | -0.19                  | 0.07                 | 0.26                 | -0.06                 |                       |                      |                      |                       |                       |                       |                       |                      |                      |
| Plas RDW 0-20 cm UDS  | 0.09                   | 0.41                 | 0.37                 | -0.13                 | 0.21                  |                      |                      |                       |                       |                       |                       |                      |                      |

|                       |       |        |       |       |       |       |        |         |        |       |      |       |
|-----------------------|-------|--------|-------|-------|-------|-------|--------|---------|--------|-------|------|-------|
| Plas RDW 0-20 cm URW  | -0.02 | 0.57** | -0.02 | 0.21  | -0.04 | 0.39  |        |         |        |       |      |       |
| Plas RDW 20-40 cm UDS | -0.29 | 0.48*  | 0.06  | 0.14  | 0.2   | 0.28  | 0.4    |         |        |       |      |       |
| Plas RDW 20-40 cm URW | -0.25 | 0.39   | 0.13  | -0.1  | 0.17  | 0.36  | 0.16   | 0.77*** |        |       |      |       |
| Plas RDW 40-60 cm UDS | -0.1  | 0.41   | -0.01 | 0.1   | 0.29  | 0.36  | 0.63** | 0.16    | 0.17*  |       |      |       |
| Plas RDW 40-60 cm URW | -0.28 | 0.25   | -0.05 | 0.13  | -0.12 | -0.03 | 0.46*  | 0.39    | 0.16*  | 0.49* |      |       |
| Plas RDW > 60 cm UDS  | 0     | -0.05  | -0.16 | -0.19 | 0     | 0.1   | -0.06  | 0.55**  | 0.59** | -0.06 | 0.04 |       |
| Plas RDW > 60 cm URW  | -0.12 | 0.14   | 0.07  | 0.4   | -0.09 | 0.18  | 0.36   | 0.26    | -0.1   | 0.27  | 0.35 | -0.06 |

90 RLD: root length density (cm cm<sup>-3</sup>), % LR: % lateral roots, RDW: root dry weight (g), plas: plasticity, TRL: total root length (cm), % LR: % lateral roots, LDS:  
91 lowland drought stress, LRW: lowland re-watered, UDS: upland drought stress, URW: upland re-watered.

92  
93

94 **Supp. Table 10.** Correlation matrix of root architectural plasticity traits measured in the Kali Aus population in the Rhizoscope study. Values shown are the  
 95 Pearson two-sided correlation coefficient and significance levels are indicated by \*: p<0.05, \*\*: p<0.01, \*\*\*: p<0.001. Correlations with the yield stability  
 96 coefficient are also shown.  
 97

|                          | Yield<br>stability<br>coeff. | Plas<br>root<br>length<br>in box | Plas<br>root<br>length | Plas<br>RDW 0-<br>15 cm | Plas<br>RDW<br>15-30<br>cm | Plas<br>RDW ><br>30 cm | Plas<br>TRDW | Plas R/S | Plas<br>Root<br>number<br>> 20 cm | Plas<br>Root<br>number<br>> 30 cm | Root<br>diameter |
|--------------------------|------------------------------|----------------------------------|------------------------|-------------------------|----------------------------|------------------------|--------------|----------|-----------------------------------|-----------------------------------|------------------|
| Plas root length in box  | 0.3                          |                                  |                        |                         |                            |                        |              |          |                                   |                                   |                  |
| Plas root length         | 0.24                         | 0.98***                          |                        |                         |                            |                        |              |          |                                   |                                   |                  |
| Plas RDW 0-15 cm         | 0.17                         | 0.88***                          | 0.85***                |                         |                            |                        |              |          |                                   |                                   |                  |
| Plas RDW 15-30 cm        | 0.16                         | 0.84***                          | 0.85***                | 0.72***                 |                            |                        |              |          |                                   |                                   |                  |
| Plas RDW > 30 cm         | 0.43                         | 0.81***                          | 0.75***                | 0.71***                 | 0.75***                    |                        |              |          |                                   |                                   |                  |
| Plas TRDW                | 0.15                         | 0.88***                          | 0.87***                | 0.98***                 | 0.8***                     | 0.72***                |              |          |                                   |                                   |                  |
| Plas R/S                 | -0.25                        | -0.34*                           | -0.32*                 | -0.34*                  | -0.11                      | -0.22*                 | -0.25*       |          |                                   |                                   |                  |
| Plas Root number > 20 cm | 0.21                         | 0.87***                          | 0.87***                | 0.73***                 | 0.86***                    | 0.7***                 | 0.76***      | -0.33    |                                   |                                   |                  |
| Plas Root number > 30 cm | -0.05                        | 0.77***                          | 0.75***                | 0.84***                 | 0.64**                     | 0.69**                 | 0.82***      | -0.16    | 0.66**                            |                                   |                  |
| Root diameter            | 0.09                         | 0.77***                          | 0.79***                | 0.81***                 | 0.61**                     | 0.75***                | 0.79***      | -0.25    | 0.53*                             | 0.73***                           |                  |
| Root cone angle          | 0.3                          | 0.23*                            | 0.26*                  | 0.25*                   | 0.1                        | 0.14                   | 0.24*        | -0.02    | 0.17*                             | 0.05                              | 0.39             |

98 RDW: root dry weight (g), TRDW: total root dry weight (g), R/S: root shoot ratio, plas: plasticity

99  
100  
101

**Supp. Table 11.** Correlations of plasticity in RDW among the field, lysimeter, and Rhizoscope studies. Values shown are the Pearson two-sided correlation coefficients, and significant correlations are indicated by \*:  $p < 0.05$ , \*\*:  $p < 0.01$ , \*\*\*:  $p < 0.001$ .

| Population | Greenhouse lysimeter experiment | Field physiology trial |                   | Rhizoscope experiment |                 |
|------------|---------------------------------|------------------------|-------------------|-----------------------|-----------------|
|            |                                 | Plas RDW 30-45 cm      | Plas RDW 45-60 cm | Plas RDW 15-30 cm     | Plas RDW >30 cm |
| Aus 276    | Plas RDW 40-60 cm LDS           | -0.55                  | 0.03              | 0.01                  | 0.32            |
|            | Plas RDW >60 cm LDS             | 0.80**                 | 0.75*             | -0.11                 | -0.03           |
|            | Plas RDW 40-60 cm LRW           | -0.17                  | 0.25              | 0.07                  | -0.02           |
|            | Plas RDW >60 cm LRW             | -0.15                  | 0.23              | -0.05                 | 0.00            |
|            | Plas RDW 40-60 cm UDS           | -0.04                  | 0.09              | -0.16                 | -0.14           |
|            | Plas RDW >60 cm UDS             | -0.16                  | 0.36              | -0.25                 | -0.02           |
|            | Plas RDW 40-60 cm URW           | 0.03                   | -0.25             | -0.19                 | -0.11           |
|            | Plas RDW >60 cm URW             | 0.38                   | 0.43              | 0.08                  | -0.11           |
| Kali Aus   | Plas RDW 40-60 cm LDS           | -0.14                  | 0.24              | 0.30                  | 0.08            |
|            | Plas RDW >60 cm LDS             | -0.15                  | -0.31             | 0.06                  | 0.34            |
|            | Plas RDW 40-60 cm LRW           | 0.58                   | -0.10             | -0.40                 | -0.45*          |
|            | Plas RDW >60 cm LRW             | 0.27                   | -0.23             | -0.2                  | 0.09            |
|            | Plas RDW 40-60 cm UDS           | 0.13                   | -0.27             | -0.30                 | -0.23           |
|            | Plas RDW >60 cm UDS             | 0.34                   | 0.18              | -0.1                  | 0.01            |
|            | Plas RDW 40-60 cm URW           | -0.15                  | -0.31             | -0.19                 | -0.16           |
|            | Plas RDW >60 cm URW             | -0.10                  | -0.43             | 0.30                  | 0.30            |

| Population | Field physiology trial | Rhizoscope experiment |                   |                 |
|------------|------------------------|-----------------------|-------------------|-----------------|
|            |                        | Plas RDW 0-15 cm      | Plas RDW 15-30 cm | Plas RDW >30 cm |
| Aus 276    | Plas RDW 0-15 cm       | 0.47                  | 0.75*             | 0.30            |
|            | Plas RDW 15-30 cm      | -0.30                 | 0.21              | -0.65           |
|            | Plas RDW 30-45 cm      | -0.12                 | -0.16             | -0.88**         |
|            | Plas RDW 45-60 cm      | 0.34                  | 0.46              | -0.32           |
| Kali Aus   | Plas RDW 0-15 cm       | -0.14                 | -0.28             | -0.11           |
|            | Plas RDW 15-30 cm      | -0.31                 | -0.11             | -0.72*          |
|            | Plas RDW 30-45 cm      | -0.07                 | 0.25              | -0.29           |
|            | Plas RDW 45-60 cm      | -0.13                 | 0.15              | -0.08           |

RDW: root dry weight (g), LDS: Lowland drought stress, LRW: Lowland re-watered, UDS: Upland drought stress, URW: Upland re-watered, Plas: plasticity

102  
103  
104

105 **Supp Table 12.** Grain yield stability in the Aus 276 and Kali Aus populations across experiments, according to the analyses showing the the best fitting  
106 variance–covariance structure according to the Akaike Information Criterion (AIC). For the AMMI-1 analysis, a relatively small coefficient indicates lower  
107 sensitivity (above average stability) to changing environmental conditions. For the Eberhart-Russell model and the Finlay-Wilkinson test, a regression  
108 coefficient close to 1.0 (indicating average stability) associated with a high mean yield indicates general adaptability. The AMMI-1 model showed the best fit for  
109 both the Aus 276 and Kali Aus populations across the seven field environments tested.

| Aus 276 population    |                  |                        |               |                        | Kali Aus population   |                  |                     |               |                        |
|-----------------------|------------------|------------------------|---------------|------------------------|-----------------------|------------------|---------------------|---------------|------------------------|
| Genotype              | Eberhart-Russell |                        | AMMI -1       |                        | Genotype              | Finlay Wilkinson |                     | AMMI -1       |                        |
|                       | $\lambda_i$      | $\sigma^2_{\delta(i)}$ | $\lambda_i$   | $\sigma^2_{\delta(i)}$ |                       | $\lambda_i$      | $\sigma^2_{\delta}$ | $\lambda_i$   | $\sigma^2_{\delta(i)}$ |
| Aus 276               | 1.0479           | 1.3072                 | 0.9224        | 0.2786                 | IR 92801-110-B        | 1.1483           | 0.2424              | 1.0412        | 0.2231                 |
| IR 94226-B-109        | 0.3574           | 1.0423                 | -0.2494       | 0.2786                 | IR 92801-134-B        | 1.2603           | 0.2424              | 1.2136        | 0.2231                 |
| IR 94226-B-145        | 0.3745           | 1.2556                 | -0.2256       | 0.2786                 | IR 92801-194-B        | 1.2032           | 0.2424              | 1.197         | 0.2231                 |
| IR 94226-B-150        | 0.3506           | 1.4934                 | -0.1974       | 0.2786                 | IR 92801-25-B         | 1.091            | 0.2424              | 0.9982        | 0.2231                 |
| IR 94226-B-167        | 0.5463           | 1.1224                 | 0.6972        | 0.2786                 | IR 92801-256-B        | 1.5941           | 0.2424              | 1.6029        | 0.2231                 |
| IR 94226-B-184        | 0.0783           | 1.5905                 | 0.5431        | 0.2786                 | IR 92801-268-B        | 0.8888           | 0.2424              | 0.8047        | 0.2231                 |
| IR 94226-B-239        | 0.1649           | 1.6014                 | 0.2586        | 0.2786                 | IR 92801-36-B         | 1.3158           | 0.2424              | 1.2624        | 0.2231                 |
| IR 94226-B-254        | 0.2869           | 0.8927                 | 0.4356        | 0.2786                 | IR 92801-360-B        | 1.543            | 0.2424              | 1.3845        | 0.2231                 |
| IR 94226-B-258        | 0.09316          | 1.5641                 | 0.3261        | 0.2786                 | IR 92801-365-B        | 1.429            | 0.2424              | 1.3419        | 0.2231                 |
| <b>IR 94226-B-265</b> | 0.03479          | 1.433                  | <b>0.264</b>  | 0.2786                 | IR 92801-368-B        | 1.6715           | 0.2424              | 1.6562        | 0.2231                 |
| IR 94226-B-353        | 0.1707           | 1.1149                 | 0.1553        | 0.2786                 | IR 92801-371-B        | 1.9969           | 0.2424              | 2.0025        | 0.2231                 |
| IR 94226-B-362        | 0.3334           | 1.851                  | 0.1426        | 0.2786                 | IR 92801-43-B         | 0.8497           | 0.2424              | 0.7619        | 0.2231                 |
| IR 94226-B-364        | 0.02737          | 1.5646                 | 0.3104        | 0.2786                 | IR 92801-434-B        | 2.2243           | 0.2424              | 2.1784        | 0.2231                 |
| IR 94226-B-372        | 0.08255          | 1.793                  | 0.4498        | 0.2786                 | <b>IR 92801-504-B</b> | 0.8246           | 0.2424              | <b>0.6875</b> | 0.2231                 |
| IR 94226-B-376        | 0.2602           | 0.8739                 | -0.0711       | 0.2786                 | <b>IR 92801-527-B</b> | 0.7261           | 0.2424              | <b>0.6185</b> | 0.2231                 |
| <b>IR 94226-B-419</b> | 0.07527          | 1.3577                 | <b>0.1497</b> | 0.2786                 | IR 92801-560-B        | 1.1144           | 0.2424              | 1.0089        | 0.2231                 |
| IR 94226-B-474        | 1.0779           | 1.0798                 | -0.2636       | 0.2786                 | IR 92801-562-B        | 1.3666           | 0.2424              | 1.319         | 0.2231                 |
| IR 94226-B-56         | 0.4239           | 1.6494                 | 0.8175        | 0.2786                 | IR 92801-634-B        | 1.2324           | 0.2424              | 1.0694        | 0.2231                 |
| IR 94226-B-57         | 0.7843           | 1.9238                 | -0.3206       | 0.2786                 | IR 92801-94-B         | 1.8071           | 0.2424              | 1.7022        | 0.2231                 |
| IR 94226-B-63         | 0.02772          | 1.4478                 | 0.44          | 0.2786                 | IR 92801-95-B         | 1.9544           | 0.2424              | 1.8525        | 0.2231                 |
| IR 94226-B-97         | 0.4055           | 2.1271                 | 0.9881        | 0.2786                 | MTU1010               | 0.5848           | 0.2424              | 0.4825        | 0.2231                 |
| MTU1010               | 0.7516           | 1.5355                 | 1.1452        | 0.2786                 | Kali Aus              | 1.1328           | 0.2424              | 1.0855        | 0.2231                 |

110  
111  $\lambda_i$  is the coefficient of regression in the case of Eberhart–Russell and Finlay–Wilkinson models and is the sensitivity of the  $i^{\text{th}}$  genotype to environmental (trial) changes in the  
112 case of AMMI model.  $\sigma^2_{\delta}$  is the deviation from regression.  $\sigma^2_{\delta(i)}$  is the specific variance associated with genotype  $i$ .

113 **Supp. Table 13.** Days to 50% flowering (DTF) in the yield-stable, root plastic genotypes and the parents in  
 114 field agronomic trials.  
 115  
 116

|                       | 2012LNS | 2012LS | 2012UNS | 2012US | 2013UNS | 2013US |
|-----------------------|---------|--------|---------|--------|---------|--------|
| <b>IR 94226-B-265</b> | 80      | 76     | 80      | 93     | 78      | 101    |
| <b>IR 94226-B-419</b> | 75      | 80     | 80      | 76     | 77      | 97     |
| <b>IR 92801-504-B</b> | 76      | 75     | 76      | 84     | 86      | 103    |
| <b>IR 92801-527-B</b> | 77      | 73     | 74      | 87     | 80      | 104    |
| <b>Aus276</b>         | 80      | 80     | 76      | 75     | 72      | 93     |
| <b>Kali Aus</b>       | 75      | 72     | 74      | 84     | 79      | 85     |
| <b>MTU1010</b>        | 81      | 78     | 77      | 85     | 75      | 91     |



117  
118**Supp Table 14.** Significant loci identified for different traits under different lysimeter treatments in the Aus 276 population.

| <b>SN.</b> | <b>Trait</b>             | <b>Chr</b> | <b>Marker</b> | <b>Position<br/>(Mbp)</b> | <b>Mean of<br/>lines with<br/>A allele</b> | <b>Mean of<br/>lines with<br/>M allele</b> | <b>Aus 276</b> | <b>MTU<br/>1010</b> | <b>P value<br/>(Q)</b> | <b>R<sup>2</sup></b> |
|------------|--------------------------|------------|---------------|---------------------------|--------------------------------------------|--------------------------------------------|----------------|---------------------|------------------------|----------------------|
| 1          | SDW LRW control          | 1          | id1000556     | 0.66                      | 53.397                                     | 40.878                                     | 43.283         | 41.23               | 0.0003                 | 0.068                |
| 2          | SDW UDS stress           | 1          | id1010526     | 17.22                     | 32.075                                     | 38.807                                     | 24.617         | 22.677              | 0.0015                 | 0.124                |
| 3          | RDW LRW control          | 1          | id1023158     | 36.44                     | 3.66                                       | 2.344                                      | 2.114          | 2.301               | 0.0255                 | 0.481                |
| 4          | SDW URW stress           | 1          | id1023892     | 37.79                     | 33.829                                     | 28.324                                     | 23.738         | 27.118              | 0.0173                 | 0.342                |
| 5          | TWU LRW stress           | 1          | id1023892     | 37.79                     | 0.964                                      | 0.788                                      | 0.736          | 0.837               | 0.0001                 | 0.489                |
| 6          | TWU LDS control          | 1          | id1023892     | 37.79                     | 1.662                                      | 1.216                                      | 1.495          | 1.222               | 0                      | 0.397                |
| 7          | WUE LDS stress           | 1          | id1023892     | 37.79                     | 28.24                                      | 24.809                                     | 25.022         | 25.629              | 0.0016                 | 0.548                |
| 8          | WUE LRW control          | 1          | id1023892     | 37.79                     | 22.948                                     | 18.798                                     | 21.746         | 15.906              | 0.0011                 | 0.368                |
| 9          | Plas RDW >60 cm UDS      | 1          | id1023892     | 37.79                     | -0.028                                     | 0.04                                       | 0.15           | 0.089               | 0.007                  | 0.303                |
| 10         | RDW 20-40 cm LDS stress  | 1          | id1023892     | 37.79                     | 1.077                                      | 0.434                                      | 0.857          | 0.33                | 0.0043                 | 0.268                |
| 11         | SDW LDS stress           | 1          | id1023892     | 37.79                     | 31.095                                     | 23.13                                      | 21.92          | 24.68               | 0                      | 0.591                |
| 12         | SDW LRW stress           | 1          | id1023892     | 37.79                     | 39.341                                     | 26.386                                     | 27.203         | 29.19               | 0                      | 0.511                |
| 13         | SDW LDS stress           | 1          | id1023892     | 37.79                     | 40.71                                      | 28.841                                     | 35.55          | 34.107              | 0                      | 0.375                |
| 14         | SDW UDS stress           | 1          | id1024972     | 39.37                     | 38.568                                     | 30.063                                     | 24.617         | 22.677              | 0.0002                 | 0.400                |
| 15         | TWU URW stress           | 2          | id2015767     | 34.87                     | 0.778                                      | 0.627                                      | 0.525          | 0.5                 | 0.0036                 | 0.455                |
| 16         | Forks >60 cm UDS control | 4          | id4010621     | 31.37                     | 30252.17                                   | 24503.61                                   | 11576          | 20419               | 0.033                  | 0.619                |
| 17         | TRL >60 cm LDS stress    | 4          | id4010621     | 31.37                     | 1836.04                                    | 189.87                                     | 1348.4         | 49.72               | 0                      | 0.845                |
| 18         | WUE LRW stress           | 5          | id5010992     | 24.09                     | 43.36                                      | 38.373                                     | 38.35          | 35.198              | 0.038                  | 0.183                |
| 19         | Forks >60 cm LRW stress  | 6          | id6004481     | 7.00                      | 21087.74                                   | 9048.63                                    | 839            | 8711.1              | 0.0019                 | 0.541                |
| 20         | Plas RDW 40-60 cm LDS    | 6          | id6008973     | 15.36                     | 17.541                                     | 8.132                                      | 12.121         | 14.153              | 0.0382                 | 0.250                |
| 21         | RDW 20-40 cm LDS control | 6          | id6012064     | 23.29                     | 1.172                                      | 0.629                                      | 0.661          | 0.2735              | 0.0454                 | 0.399                |
| 22         | Plas RDW >60 cm LRW      | 6          | id6012064     | 23.29                     | 1.902                                      | 0.178                                      | -0.149         | 0.605               | 0.0063                 | 0.388                |
| 23         | RDW 0-20 cm URW control  | 6          | id6013529     | 25.15                     | 2.315                                      | 1.352                                      | 1.631          | 0.986               | 0.049                  | 0.495                |
| 24         | TWU LDS control          | 9          | id9000389     | 1.33                      | 1.329                                      | 1.542                                      | 1.495          | 1.222               | 0                      | 0.195                |
| 25         | TWU URW control          | 9          | id9000389     | 1.33                      | 1.536                                      | 1.828                                      | 1.614          | 1.814               | 0.0033                 | 0.197                |
| 26         | SDW LDS control          | 9          | id9000389     | 1.33                      | 31.983                                     | 37.797                                     | 35.55          | 34.11               | 0.0002                 | 0.240                |
| 27         | RGR LDS control          | 9          | id9000661     | 2.36                      | 0.257                                      | 0.182                                      | 0.223          | 0.155               | 0.0076                 | 0.345                |
| 28         | % LR >60 cm LRW stress   | 11         | id11000133    | 0.68                      | 77.11                                      | 61.46                                      | 51.51          | 56.02               | 0.037                  | 0.209                |
| 29         | RDW 20-40 cm UDS control | 11         | id11008862    | 23.02                     | 0.647                                      | 0.412                                      | 0.3584         | 0.2958              | 0.0335                 | 0.530                |

|    |                          |    |            |       |         |         |        |        |        |       |
|----|--------------------------|----|------------|-------|---------|---------|--------|--------|--------|-------|
| 30 | RDW 20-40 cm UDS stress  | 11 | id11010335 | 26.30 | 0.954   | 0.607   | 0.5436 | 0.6493 | 0.0105 | 0.458 |
| 31 | RDW >60 cm LRW control   | 12 | id12000605 | 1.32  | 0.031   | 0.008   | 0.0031 | 0.0258 | 0.0182 | 0.636 |
| 32 | SDW LRW control          | 12 | id12000605 | 1.32  | 56.99   | 46.44   | 43.28  | 41.23  | 0.0079 | 0.225 |
| 33 | TWU UDS stress           | 12 | id12000605 | 1.32  | 0.871   | 0.769   | 0.867  | 0.737  | 0.0029 | 0.190 |
| 34 | RDW 40-60 cm LDS control | 12 | id12001321 | 3.21  | 0.443   | 0.197   | 0.306  | 0.06   | 0.0156 | 0.452 |
| 35 | % LR >60 cm URW stress   | 12 | id12001321 | 3.21  | 71.42   | 86.49   | 72.52  | 74.80  | 0.0045 | 0.438 |
| 36 | TRL >60 cm UDS stress    | 12 | id12004047 | 10.47 | 3494.44 | 2744.33 | 3238.7 | 3222.7 | 0.0147 | 0.365 |
| 37 | RDW 0-20 cm LRW control  | 12 | id12007988 | 23.29 | 1.127   | 2.066   | 1.315  | 1.705  | 0.0117 | 0.407 |

119

120 TWU: Total water uptake (kg), RGR: relative growth rate from 24 to 31 days after sowing ( $\text{g g}^{-1} \text{d}^{-1}$ ), RDW: root dry weight (g), SDW: shoot dry weight (g),  
 121 WUE: water use efficiency ( $\text{g shoot mass L}^{-1} \text{water uptake}$ ), TRL: total root length (cm), % LR: % lateral roots, LDS: lowland drought stress, LRW: lowland re-  
 122 watered, UDS: upland drought stress, URW: upland re-watered, plas: plasticity, chr: chromosome, A: Aus 276, M: MTU1010, R<sup>2</sup>: phenotypic variance.

123

124

125

126

127

128

129

130  
131**Supp Table 15.** Significant loci identified for different traits under field condition in the Aus 276 population.

| SN | Trait                       | Chr | Marker     | Position (Mbp) | Mean of lines with A allele | Mean of lines with M allele | Aus 276 | MTU1010 | P value (Q) | R <sup>2</sup> |
|----|-----------------------------|-----|------------|----------------|-----------------------------|-----------------------------|---------|---------|-------------|----------------|
| 1  | Plas Forks 0-15 cm          | 1   | id1011535  | 19.27          | -7.28                       | -25.51                      | -7.17   | -1.15   | 0.0246      | 0.672          |
| 2  | Plas RLD 30-45 cm           | 1   | id1011535  | 19.27          | 5.66                        | 16.581                      | 6.623   | 2.161   | 0.0142      | 0.655          |
| 3  | Plas RLD 0-15 cm            | 1   | id1012481  | 22.04          | -12.45                      | -28.03                      | -12.01  | -5.78   | 0.0085      | 0.644          |
| 4  | Plas Ave root diam 15-30 cm | 1   | id1024972  | 39.37          | -3.859                      | 4.572                       | 5.866   | 3.481   | 0.0162      | 0.806          |
| 5  | Plas % LR 15-30 cm          | 1   | id1024972  | 39.37          | 1.242                       | -3.92                       | 2.41    | -1.29   | 0.02        | 0.401          |
| 6  | Plas % LR 45-60 cm          | 1   | id1024972  | 39.37          | 12.06                       | -30.95                      | 11.01   | -20.32  | 0.007       | 0.618          |
| 7  | % LR 30-45 cm               | 3   | id3200001  | 16.73          | 59.74                       | 67.54                       | 66.28   | 66.87   | 0.0231      | 0.314          |
| 8  | GY 2013UNS                  | 5   | id5000759  | 1.13           | 2962                        | 4004.61                     | 6711.8  | 5048    | 0.0001      | 0.644          |
| 9  | GY 2013US                   | 5   | id5009997  | 22.71          | 19.88                       | 87.94                       | 98.75   | 56.78   | 0.0313      | 0.806          |
| 10 | RDW 0-15 cm                 | 5   | id5010992  | 24.09          | 0.0263                      | 0.0162                      | 0.0168  | 0.02    | 0.0038      | 0.030          |
| 11 | RLD 0-15 cm                 | 5   | id5010992  | 24.09          | 9.68                        | 4.854                       | 6.068   | 5.412   | 0.0006      | 0.014          |
| 12 | GY 2013US                   | 5   | id5010992  | 24.09          | 100                         | 22.595                      | 62      | 54.9    | 0.0489      | 0.071          |
| 13 | Plas RLD 15-30 cm           | 6   | id6012064  | 23.29          | -2.29                       | 6.472                       | 6.33    | 4.526   | 0.0171      | 0.695          |
| 14 | RLD 15-30 cm                | 8   | id8001477  | 4.56           | 1.135                       | 0.837                       | 1.08    | 1.067   | 0.0087      | 0.060          |
| 15 | RDW 45-60 cm                | 9   | id9000389  | 1.33           | 0.0018                      | 0.0031                      | 0.0005  | 0.0008  | 0.0457      | 0.576          |
| 16 | Plas % LR 45-60 cm          | 9   | id9000661  | 2.36           | 0.52                        | 10.738                      | 1.39    | -3.168  | 0.0099      | 0.770          |
| 17 | % LR 45-60 cm               | 9   | id9001352  | 5.31           | 13.52                       | 25.56                       | 34.45   | 44.24   | 0.0009      | 0.879          |
| 18 | Plas % LR 15-30 cm          | 9   | id9001352  | 5.31           | 1.841                       | -3.188                      | 0.491   | 1.696   | 0.0378      | 0.532          |
| 19 | Plas % LR 45-60 cm          | 9   | id9001352  | 5.31           | 2.52                        | 5.992                       | 1.39    | -3.168  | 0.0333      | 0.768          |
| 20 | GY 2012LNS                  | 10  | id10003056 | 11.79          | 3894.56                     | 4896.69                     | 3621.9  | 3300.6  | 0.0023      | 0.298          |
| 21 | GY 2013US                   | 10  | id10003056 | 11.79          | 176.96                      | 192.26                      | 231.68  | 128.58  | 0.014       | 0.477          |
| 22 | Ave root diam 30-45 cm      | 11  | id11000133 | 0.68           | 0.323                       | 0.259                       | 0.255   | 0.242   | 0.0397      | 0.031          |
| 23 | RLD 45-60 cm                | 11  | id11010335 | 26.30          | 0.11                        | 0.269                       | 0.256   | 0.204   | 0.017       | 0.575          |

132

133

134

135

136

137

138

139

140

141

142

143

RDW: root dry weight (g), RLD: root length density (cm cm<sup>-3</sup>), Ave root diam: average root diameter (mm), % LR: % lateral roots, GY: grain yield (kg ha<sup>-1</sup>), US: upland stress, LNS: lowland non-stress, UNS: upland non-stress, chr: chromosome, A: Aus 276, M: MTU1010, R<sup>2</sup>: phenotypic variance

144 **Supp Table 16.** Significant loci identified for different traits under different lysimeter treatments in the Kali Aus population.  
 145

| Trait                              | Chr | Marker    | Position (Mbp) | Mean of lines with K allele | Mean of lines with M allele | Kali Aus | MTU1010 | P value (Q) | R <sup>2</sup> |
|------------------------------------|-----|-----------|----------------|-----------------------------|-----------------------------|----------|---------|-------------|----------------|
| 1 Plas RDW 40-60 cm UDS stress     | 1   | id1012481 | 22.04          | -1.072                      | 11.97                       | 0.072    | -1.254  | 0.0103      | 0.274          |
| 2 Plas RDW 20-40 cm LRW stress     | 1   | id1015541 | 26.70          | -0.483                      | -0.116                      | -0.535   | -0.177  | 0.0009      | 0.296          |
| 3 RDW 20-40 cm LRW control         | 1   | id1019332 | 31.83          | 1.014                       | 0.626                       | 1.073    | 0.463   | 0.0196      | 0.396          |
| 4 SDW LDS stress                   | 1   | id1023892 | 37.79          | 30.31                       | 25.94                       | 34.83    | 24.68   | 0.0007      | 0.357          |
| 5 WUE UDS control                  | 1   | id1024972 | 39.37          | 26.459                      | 21.124                      | 24.03    | 19.99   | 0.0019      | 0.410          |
| 6 TWU LDS control                  | 1   | id1025983 | 40.78          | 1759.7                      | 1503.11                     | 1.99     | 1.22    | 0.0448      | 0.239          |
| 7 Plas RDW >60 cm URW              | 3   | id3000111 | 0.41           | 4.364                       | 0.893                       | 1.357    | 1.756   | 0.0289      | 0.163          |
| 8 RGR UDS stress                   | 3   | id3000111 | 0.41           | 0.2699                      | 0.1771                      | 0.249    | 0.229   | 0.0499      | 0.018          |
| 9 RGR URW control                  | 3   | id3002377 | 4.27           | 0.1356                      | 0.2576                      | 0.156    | 0.248   | 0.0002      | 0.454          |
| 10 SDW UDS stress                  | 3   | id3002377 | 4.27           | 37.88                       | 26.31                       | 31.08    | 37.59   | 0.0008      | 0.277          |
| 11 TWU UDS stress                  | 3   | id3002377 | 4.27           | 1.5                         | 1.124                       | 1.58     | 1.098   | 0.0001      | 0.402          |
| 12 RGR UDS stress                  | 3   | id3011048 | 25.52          | 0.1318                      | 0.2357                      | 0.177    | 0.183   | 0.0179      | 0.491          |
| 13 RDW 0-20 cm UDS stress          | 3   | dd3000535 | 27.67          | 1.76                        | 1.242                       | 1.894    | 1.402   | 0.0295      | 0.319          |
| 14 RDW 0-20 cm LRW control         | 3   | id3015399 | 32.01          | 3.316                       | 1.611                       | 1.458    | 1.705   | 0.0002      | 0.594          |
| 15 Plas RDW 40-60 cm URW           | 3   | id3015399 | 32.01          | -20.67                      | 1.02                        | -1.349   | -15.88  | 0.0008      | 0.378          |
| 16 R/S LRW control                 | 3   | id3015399 | 32.01          | 0.0962                      | 0.0568                      | 0.0636   | 0.054   | 0.0004      | 0.484          |
| 17 Plas RDW 0-20 cm LDS stress     | 3   | id3016429 | 33.63          | 0.447                       | -0.964                      | 0.275    | -0.293  | 0.00048     | 0.203          |
| 18 Plas RDW 20-40 cm LRW stress    | 3   | id3016429 | 33.63          | -0.592                      | -0.175                      | -0.535   | -0.177  | 0.0021      | 0.210          |
| 19 Forks >60 cm LRW control        | 3   | id3016429 | 33.63          | 13169.19                    | 4823.63                     | 15185.17 | 5802    | 0.0062      | 0.394          |
| 20 TRL >60 cm LRW control          | 3   | id3017266 | 34.94          | 1789.61                     | 562.06                      | 2132.72  | 827.633 | 0.0038      | 0.394          |
| 21 Plas RDW 0-20 cm LDS            | 3   | id3017266 | 34.94          | 0.3                         | -1.066                      | 0.275    | -0.293  | 0.00017     | 0.310          |
| 22 Plas RDW 20-40 cm UDS           | 3   | id3017266 | 34.94          | 0.485                       | -0.103                      | -0.309   | 0.153   | 2.20E-06    | 0.233          |
| 23 Plas RDW >60 cm UDS             | 4   | id4001113 | 2.48           | -0.0755                     | 0.0898                      | -0.108   | 0.054   | 6.20E-07    | 0.301          |
| 24 Plas RDW UDS >60 cm             | 4   | id4002562 | 6.48           | -1.02                       | 4.82                        | -1.84    | 2.888   | 0.0343      | 0.303          |
| 25 Ave root diam >60 cm UDS stress | 4   | id4005867 | 19.93          | 0.1477                      | 0.1285                      | 0.120    | 0.128   | 0.0271      | 0.317          |
| 26 TWU URW stress                  | 5   | id5004668 | 9.21           | 0.926                       | 1.011                       | 0.802    | 0.911   | 0.0001      | 0.285          |
| 27 Plas RDW 20-40 cm UDS stress    | 5   | id5012152 | 25.68          | 0.465                       | -0.226                      | -0.309   | 0.153   | 3.40E-09    | 0.432          |
| 28 R/S UDS stress                  | 5   | id5012480 | 26.26          | 0.1371                      | 0.1031                      | 0.14     | 0.113   | 0.0031      | 0.539          |

|    |                                 |    |            |       |          |          |          |         |          |       |
|----|---------------------------------|----|------------|-------|----------|----------|----------|---------|----------|-------|
| 29 | Plas RDW 0-20 cm UDS            | 5  | id5012480  | 26.26 | 0.522    | -0.285   | -0.339   | 0.131   | 0.00022  | 0.226 |
| 30 | Plas RDW 20-40 cm UDS           | 5  | id5012480  | 26.26 | 0.374    | -0.118   | -0.309   | 0.153   | 3.80E-08 | 0.251 |
| 31 | % LR >60 cm URW stress          | 6  | id6004481  | 7.00  | 118.55   | 83.86    | 89.19    | 88.65   | 0.0031   | 0.485 |
| 32 | Ave root diam >60 cm URW stress | 6  | id6004481  | 7.00  | 3.4942   | 0.1242   | 0.117    | 0.139   | 0.0099   | 0.620 |
| 33 | RDW >60 cm URW control          | 7  | id7001912  | 10.81 | 0.079    | 0.018    | 0.069    | 0.022   | 0.0039   | 0.393 |
| 34 | Plas RDW 40-60 cm LDS           | 8  | id8002662  | 8.68  | 17.38    | 4.73     | 2.706    | 14.15   | 0.014    | 0.301 |
| 35 | RDW 40-60 cm LRW control        | 8  | wd8003200  | 17.18 | 1.056    | 0.481    | 1.151    | 0.108   | 0.0252   | 0.307 |
| 36 | RGR LDS stress                  | 8  | id8005359  | 19.83 | 0.2405   | 0.167    | 0.219    | 0.198   | 0.0043   | 0.413 |
| 37 | RDW 0-20cm LDS control          | 9  | id9000661  | 2.36  | 3.13     | 1.595    | 1.41     | 1.359   | 0.0021   | 0.469 |
| 38 | TWU LDS stress                  | 9  | id9002563  | 8.71  | 1.28     | 0.921    | 1.012    | 0.766   | 0.0006   | 0.232 |
| 39 | TRL >60 cm LRW stress           | 9  | id9005086  | 16.48 | 3171.95  | 1602.59  | 2710.21  | 1107.38 | 0.0269   | 0.381 |
| 40 | RDW 0-20 cm LDS stress          | 9  | id9006988  | 19.49 | 2.176    | 1.149    | 1.685    | 1.067   | 0.0014   | 0.431 |
| 41 | Plas RDW >60 cm URW             | 10 | id10000644 | 2.35  | 3.403    | 0.344    | 1.357    | 1.756   | 0.0519   | 0.281 |
| 42 | Forks >60 cm UDS control        | 10 | ud10000620 | 9.99  | 45155.05 | 15837.32 | 71614.89 | 20419.7 | 0        | 0.319 |
| 43 | TRL >60 cm UDS control          | 10 | ud10000620 | 9.99  | 4370.63  | 1982.2   | 5903.9   | 2332.81 | 0.0002   | 0.342 |
| 44 | RGR UDS stress                  | 10 | id10003555 | 13.55 | 0.179    | 0.2069   | 0.24927  | 0.22893 | 0.0405   | 0.538 |
| 45 | Forks >60 cm URW stress         | 10 | id10006161 | 19.52 | 37441.34 | 19569.21 | 55052.13 | 19574.5 | 0.0022   | 0.513 |
| 46 | RDW 20-40 cm URW stress         | 11 | id11003556 | 9.13  | 0.504    | 0.355    | 0.3175   | 0.321   | 0.0192   | 0.614 |
| 47 | Forks >60 cm LRW stress         | 11 | id11003556 | 9.13  | 34011.96 | 14905.69 | 27962.42 | 8711.13 | 0.0161   | 0.373 |
| 48 | Forks >60 cm UDS stress         | 11 | id11005065 | 15.45 | 21654.51 | 25491.5  | 34182.13 | 25804.0 | 0.0511   | 0.403 |
| 49 | TRL >60 cm UDS stress           | 11 | id11005065 | 15.45 | 2633.43  | 3043.77  | 3719.59  | 3222.79 | 0.0134   | 0.443 |
| 50 | RDW 20-40 cm LDS control        | 12 | id12003803 | 9.54  | 1.645    | 0.687    | 1.562    | 0.274   | 0.0043   | 0.518 |

146

147 TWU: Total water uptake (kg), RGR: relative growth rate from 24 to 31 days after sowing ( $\text{g g}^{-1} \text{d}^{-1}$ ), RDW: root dry weight (g), SDW: shoot dry weight (g),  
 148 WUE: water use efficiency ( $\text{g shoot mass L}^{-1}$  water uptake), R/S: root/shoot ratio, TRL: total root length (cm), % LR: % lateral roots, LDS: lowland drought  
 149 stress, LRW: lowland re-watered, UDS: upland drought stress, URW: upland re-watered, chr: chromosome, K: Kali Aus, M: MTU1010,  $R^2$ : phenotypic  
 150 variance.

151

152

153

154

155

156  
157**Supp Table 17.** Significant loci identified for different traits under field conditions in the Kali Aus population

| SN | Trait                 | Chr | Marker    | Position (Mbp) | Mean of lines with K allele | Mean of lines with M allele | Kali Aus | MTU10 10 | P value (Q) | R <sup>2</sup> |
|----|-----------------------|-----|-----------|----------------|-----------------------------|-----------------------------|----------|----------|-------------|----------------|
| 1  | GY 2012LNS            | 1   | id1000556 | 0.66           | 3444.5                      | 5890.51                     | 3232.63  | 4450.93  | 0.0052      | 0.603          |
| 2  | Plas Forks 15-30 cm   | 1   | id1019332 | 31.83          | 0.603                       | -9.463                      | -0.948   | 1.821    | 0.0054      | 0.890          |
| 3  | RLD 15-30 cm          | 4   | id4000641 | 1.05           | 0.672                       | 0.995                       | 0.717    | 0.756    | 0.0416      | 0.283          |
| 4  | Plas RLD 45-60 cm     | 4   | id4002562 | 6.48           | 2.661                       | -1.305                      | -3.555   | -0.911   | 0.0089      | 0.771          |
| 5  | Plas Forks 45-60 cm   | 4   | id4002562 | 6.48           | 1.351                       | -5.717                      | -11.543  | -4.972   | 0.0027      | 0.831          |
| 6  | Plas % LR 15-30       | 4   | id4003973 | 13.46          | -3.533                      | 0.913                       | 0.77     | 1.696    | 0.0096      | 0.675          |
| 7  | GY 2013US             | 4   | id4005867 | 19.93          | 40.19                       | 12.9                        | 5.08     | 19.88    | 0.0281      | 0.021          |
| 8  | Ave root diam 0-15 cm | 5   | id5000015 | 0.04           | 0.191                       | 0.153                       | 0.172    | 0.191    | 0.0048      | 0.079          |
| 9  | Plas % LR 15-30 cm    | 5   | id5010661 | 23.66          | -0.433                      | -0.433                      | 2.42     | 5.534    | 0.042       | 0.409          |
| 10 | GY 2012US             | 7   | id7001156 | 6.99           | 121                         | 899.35                      | 556.63   | 273.1    | 0.0083      | 0.786          |
| 11 | Plas RDW 30-45 cm     | 7   | id7001156 | 6.99           | 9.43                        | 23.265                      | 8.882    | 10.465   | 0.0384      | 0.745          |

158

159

160

161

162

163

164

165

166

RDW: root dry weight (g), RLD: root length density (cm cm<sup>-3</sup>), Ave root diam: average root diameter (mm), % LR: % lateral roots, GY: grain yield (kg ha<sup>-1</sup>), US: upland stress, LNS: lowland non-stress, chr: chromosome, K: Kali Aus, M: MTU1010, R<sup>2</sup>: phenotypic variance

167  
168  
169  
170  
171  
172  
173  
174  
175  
176  
177  
178  
179  
180  
181  
182  
183  
184  
185

**Supp. Table 18.** Composition of the modified Yoshida nutrient solutions used in the Rhizoscope study.

| <b>Salt</b>                                                                        | <b>Concentration</b> |
|------------------------------------------------------------------------------------|----------------------|
| (NH <sub>4</sub> ) <sub>2</sub> SO <sub>4</sub>                                    | 0.5 mM               |
| MgSO <sub>4</sub> ·7H <sub>2</sub> O                                               | 1.6 mM               |
| Ca(NO <sub>3</sub> ) <sub>2</sub> ·4H <sub>2</sub> O                               | 1.2 mM               |
| KNO <sub>3</sub>                                                                   | 0.7 mM               |
| MnSO <sub>4</sub> ·H <sub>2</sub> O                                                | 10 μM                |
| (NH <sub>4</sub> ) <sub>6</sub> Mo <sub>7</sub> O <sub>24</sub> ·4H <sub>2</sub> O | 0.16 μM              |
| ZnSO <sub>4</sub> ·7H <sub>2</sub> O                                               | 0.7 μM               |
| CuSO <sub>4</sub> ·5H <sub>2</sub> O                                               | 0.8 μM               |
| H <sub>3</sub> BO <sub>3</sub>                                                     | 22.6 μM              |
| FeSO <sub>4</sub>                                                                  | 100 μM               |
| Na <sub>2</sub> EDTA                                                               | 100 μM               |
| Control (P) KH <sub>2</sub> PO <sub>4</sub>                                        | 0.4 mM               |
| Stress (P/8) KH <sub>2</sub> PO <sub>4</sub>                                       | 0.05 mM              |

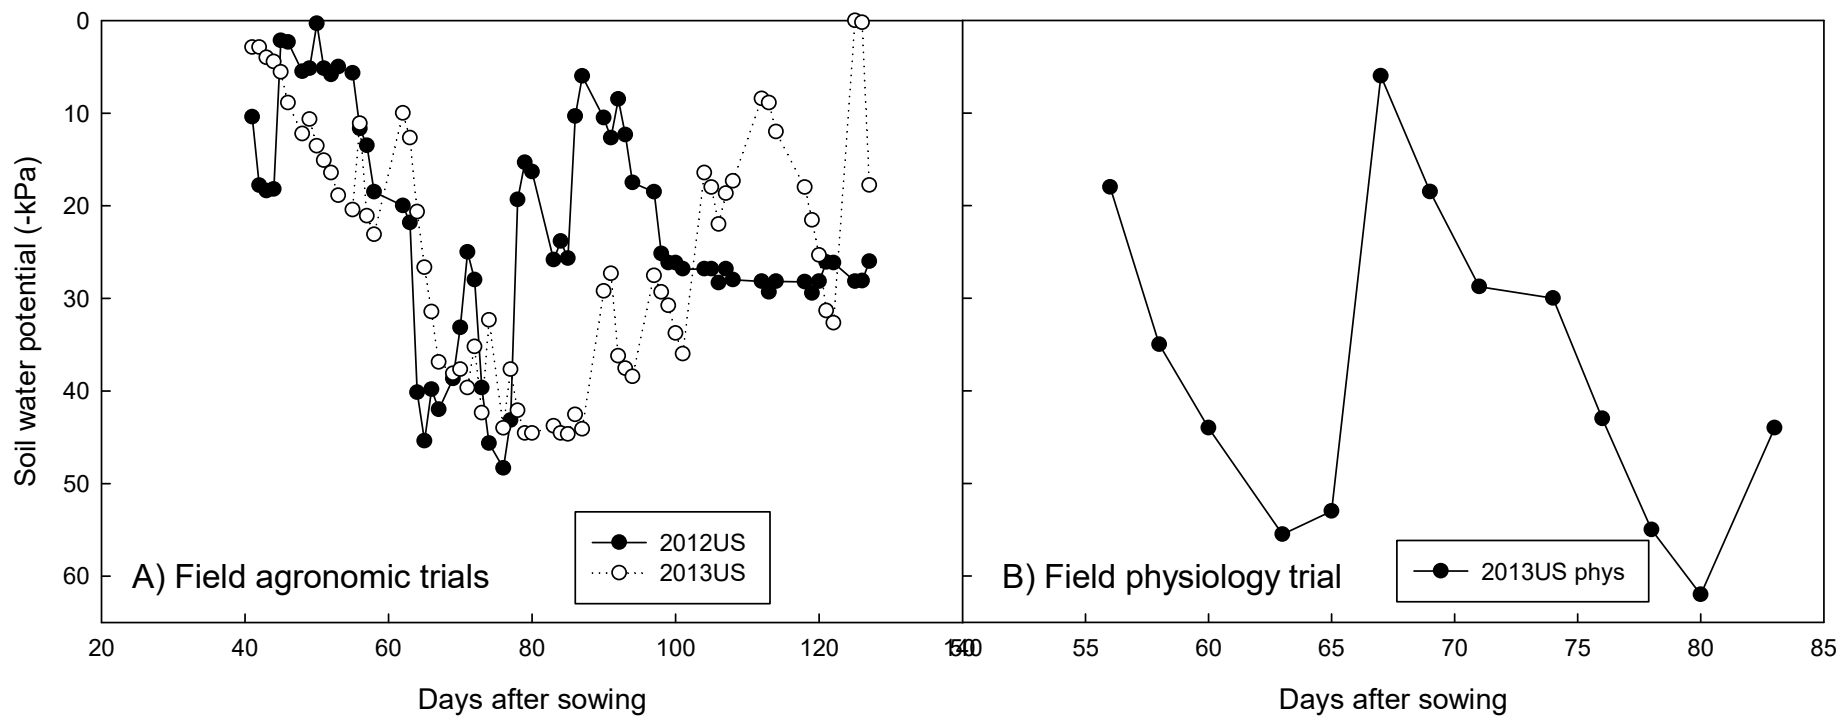

187

188

189

190

191

192

193

194

195

196

**Supp. Fig. 1.** Soil water potential measured by tensiometers in field studies at the soil depth of 30 cm in (A) the 2012 and 2013 direct-seeded upland stress agronomic trials (2012US and 2013US) and (B) in the physiology trial (2013US phys). Values shown are means of readings from three replicate tensiometers.



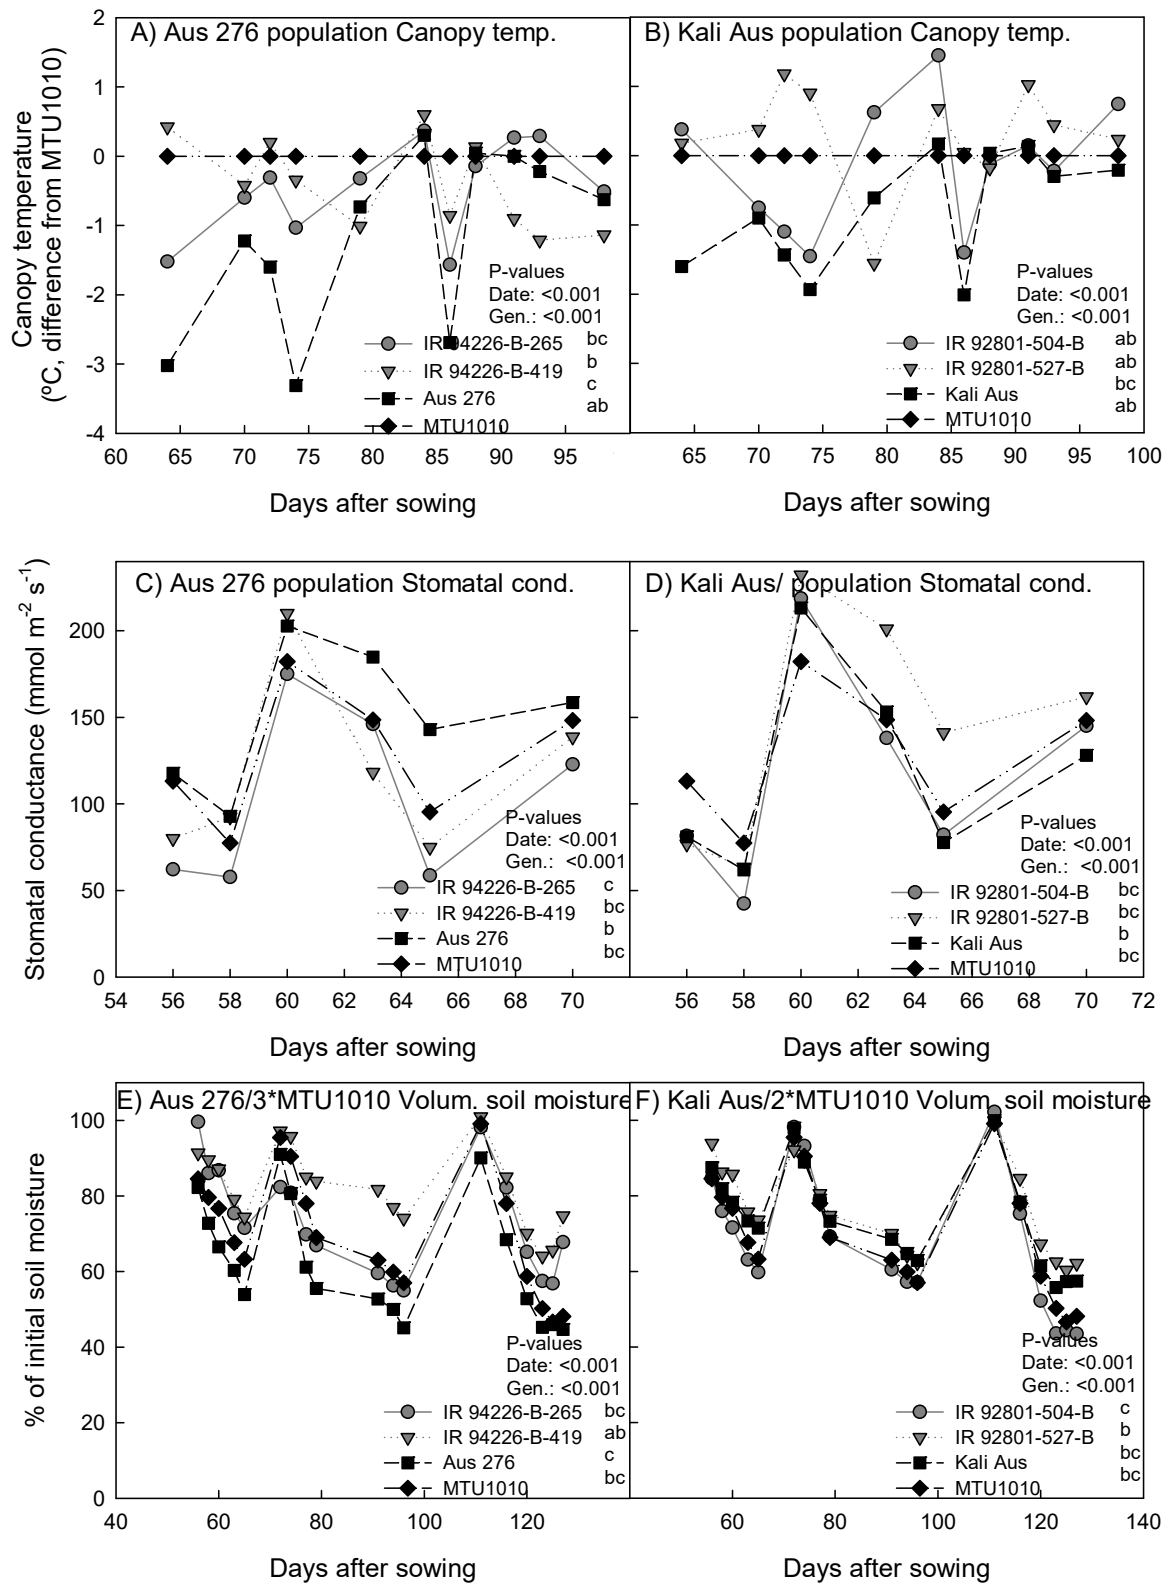

197

198 **Supp. Fig 2.** Functional comparison of the parents with the root plastic, yield stable genotypes in the field  
 199 physiology study. A-B) canopy temperature, C-D) stomatal conductance, and E-F) volumetric soil moisture the  
 200 depth of 30 cm in the Aus 276 and Kali Aus populations, respectively. Values shown are means, n=3. The two  
 201 populations are shown separately for clarity, but significance levels are the result of a common statistical  
 202 analysis since the genotypes from both populations were grown together in the same field randomization.

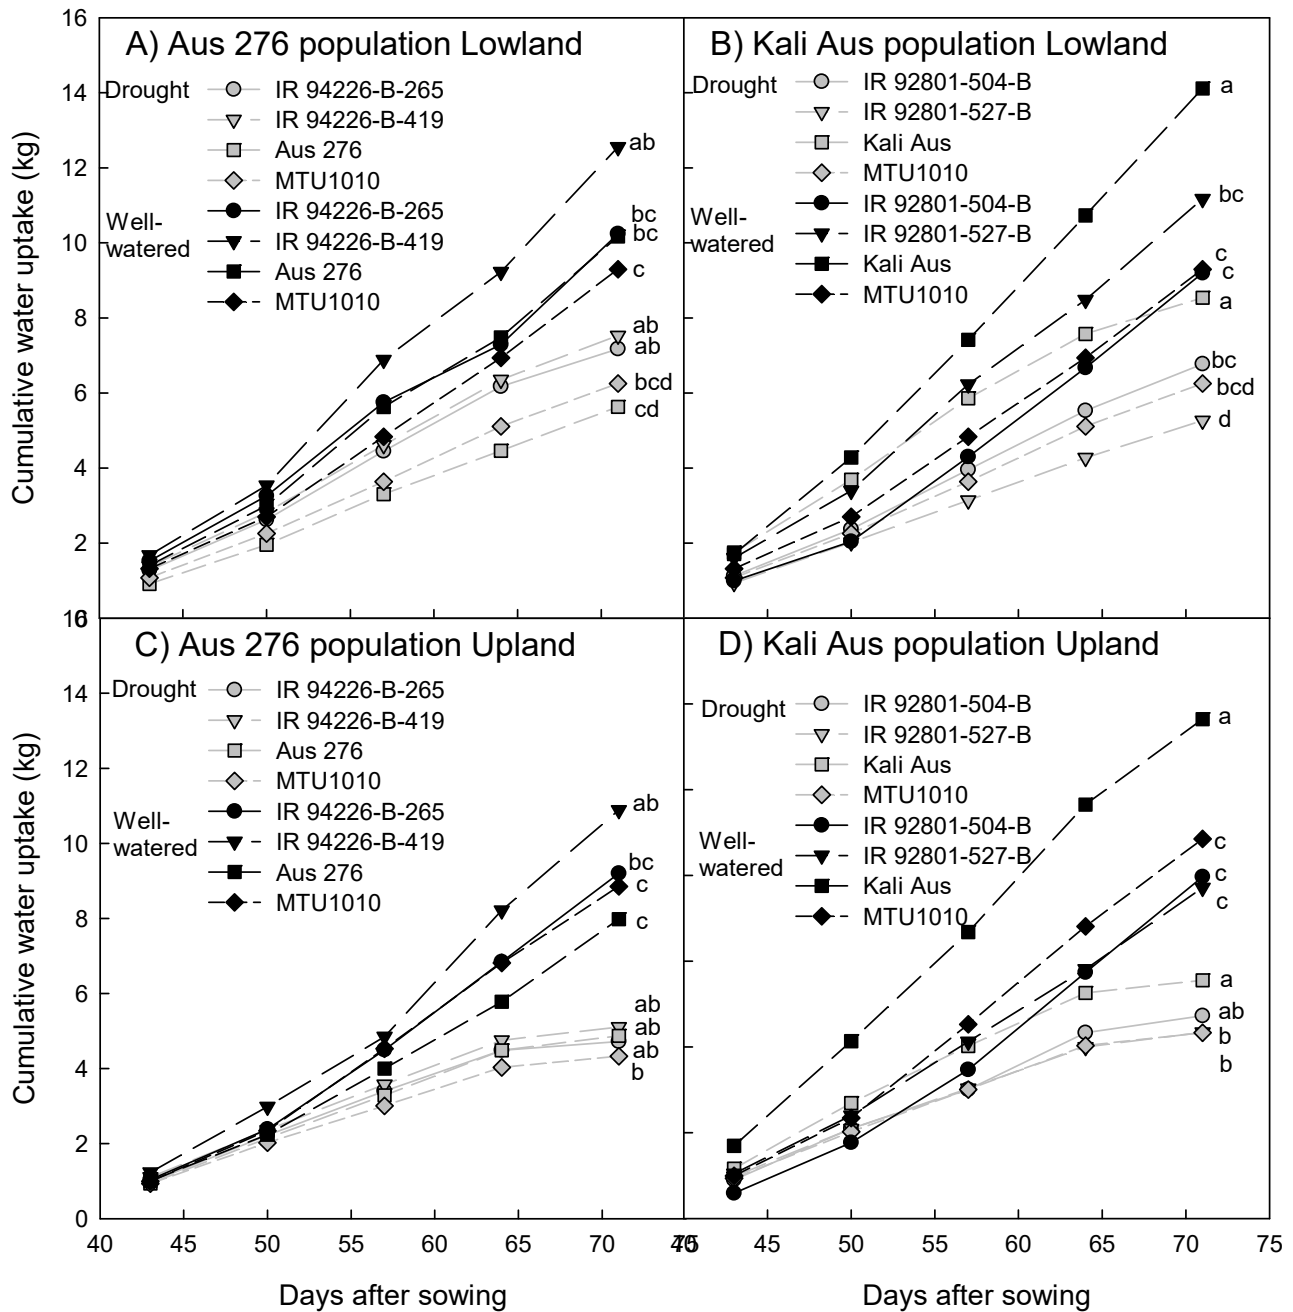

204

205

206 **Supp. Fig 3.** Cumulative water uptake in the lysimeter experiment for the genotypes showing highest yield  
 207 stability across field studies (A) Aus 276 population lowland treatments, B) Kali Aus population lowland  
 208 treatments, C) Aus 276 population upland treatments, D) Kali Aus population upland treatments. Black lines  
 209 indicate well-watered treatments and gray lines indicate drought stress treatments. The data were pooled for  
 210 drought (DS) and rewatered (RW) treatments and for the well-watered control treatments for these graphs since  
 211 there were no differences in protocol for those treatments during the time frame shown here. Letters indicate  
 212 significance groups based on an analysis of the total water uptake within each treatment (n=6 for WW  
 213 treatments and n=8 for drought stress treatments) that included only the 7 genotypes shown here. Significance  
 214 levels for genotype were: Lowland well-watered = 0.014, Lowland drought <0.001, Upland well-watered <0.001,  
 215 and Upland drought = 0.244.
